# Supplementary material
Source: PubMed Central journal article supplement (PMC7661081)
Supplement: 20-00256.pdf [file 20-00256.pdf]

**On-line Table: Patient summary<sup>a</sup>**

|                                           | Neurologic Clinical History                                                                                                                            | Age                                | Reported Brain Findings, MR Imaging Unless Otherwise Specified                                                                                                                                                                                                                                                                          | Reference                       |
|-------------------------------------------|--------------------------------------------------------------------------------------------------------------------------------------------------------|------------------------------------|-----------------------------------------------------------------------------------------------------------------------------------------------------------------------------------------------------------------------------------------------------------------------------------------------------------------------------------------|---------------------------------|
| <b>New patients</b>                       |                                                                                                                                                        |                                    |                                                                                                                                                                                                                                                                                                                                         |                                 |
| New patient 1 (Saudi Arabia)              | Squint and lower extremity weakness, progressive encephalopathy                                                                                        | 4 yr                               | MR imaging without contrast; lesions in the basal ganglia, brain stem, and cerebellum; enhancing cerebellar lesions                                                                                                                                                                                                                     | This report                     |
| New patient 2 (Saudi Arabia)              | Seizure, left arm weakness                                                                                                                             | 8 yr                               | MR imaging without contrast; multiple focal T2 hyperintense lesions in cerebral and cerebellar cortex                                                                                                                                                                                                                                   | This report                     |
| New patient 3 (United States)             | Sensorineural hearing loss, progressive CNS findings, esotropia, microcephaly, axial hypotonia, developmental regression, somnolence, seizures, chorea | Prenatal<br>6 wk<br>13 mo<br>15 mo | MR imaging without contrast; subcortical edema, volume loss, T2 hyperintensities in the basal ganglia, internal capsules, ventrolateral thalami, cerebral peduncles, central tegmental tracts and calcifications in globus palladi; progressive edema and necrosis on follow-up                                                         | This report                     |
| New patient 4 (Turkey)                    | Rule out brain injury after fall; hypotonia, global developmental delay, ptosis, macrocephaly, incontinence                                            | 1 yr<br>2 yr                       | MR imaging without contrast; agenesis of corpus callosum; cerebral cortical atrophy; periventricular T2 and FLAIR hyperintensity                                                                                                                                                                                                        | This report                     |
| <b>Previously published patients</b>      |                                                                                                                                                        |                                    |                                                                                                                                                                                                                                                                                                                                         |                                 |
| Settas et al <sup>11</sup> (Saudi Arabia) | No neurologic symptoms or findings except for seizure associated with hypoglycemia; family history positive for cousin with hemiparesis and strabismus | 5 yr                               | MR imaging with and without enhancement; foci of T2-FLAIR hyperintensity noted in the basal ganglia, worse in the caudate and anterior putamen, with a decrease in the size of the caudate nuclei; globus pallidus is completely spared bilaterally; intrinsic T1 hyperintensity of the caudate heads; no abnormal contrast enhancement | Settas et al <sup>11</sup>      |
| Bamborschke et al <sup>10</sup> (Germany) | Neonate with microcephaly                                                                                                                              | 3 wk                               | MR imaging without contrast; generalized cortical atrophy, simplified gyral pattern, hypoplastic temporal lobes, cerebellar hypoplasia; thalamic and hippocampal hyperintensity (T2-FLAIR) extending through the mesencephalon to the pons; no diffusion restriction                                                                    | Bamborschke et al <sup>10</sup> |
| Prasad et al <sup>6</sup> 5               | Complex partial seizures, developmental delay, failure to thrive, ataxia, sensorineural hearing loss, cranial nerve palsies (III, IV), synkinesia      | 8 mo<br>4 yr                       | MR imaging with and without contrast; contrast enhancement was seen in the globus pallidus, medial thalamic nucleus, and central pons                                                                                                                                                                                                   | Prasad et al <sup>6</sup>       |
| Prasad et al <sup>6</sup> 6               | Developmental delay, regression, ataxia, hypotonia, sensorineural hearing loss                                                                         | 9 yr                               | MR imaging with and without contrast; contrast enhancement of cerebellar structures, among other features                                                                                                                                                                                                                               | Prasad et al <sup>6</sup>       |

*Continued on next page*

**On-line Table: Continued**

|                                                 | Neurologic Clinical History                                                   | Age   | Reported Brain Findings, MR Imaging Unless Otherwise Specified                       | Reference                 |
|-------------------------------------------------|-------------------------------------------------------------------------------|-------|--------------------------------------------------------------------------------------|---------------------------|
| Lovric et al <sup>5</sup> A544407–306 (Spanish) | None noted                                                                    | 4 yr  | Normal CT findings                                                                   | Lovric et al <sup>5</sup> |
| Lovric et al <sup>5</sup> A544407–142 (Spanish) | None noted                                                                    | 11 yr | MR imaging with and without contrast; normal MR imaging findings; normal CT findings | Lovric et al <sup>5</sup> |
| Lovric et al <sup>5</sup> EB1 (Turkey)          | Microcephaly                                                                  | 1 mo  | MR imaging without contrast; microcephaly, thin corpus callosum, small pons          | Lovric et al <sup>5</sup> |
| Lovric et al <sup>5</sup> B46 (Morocco)         | Microcephaly, hypotonia, developmental delay, deafness                        | 3 mo  | MR imaging without contrast; microcephaly                                            | Lovric et al <sup>5</sup> |
| Lovric et al <sup>5</sup> B56 (Morocco)         | Microcephaly, hypotonia, developmental delay, deafness                        | 1 mo  | MR imaging without contrast; microcephaly                                            | Lovric et al <sup>5</sup> |
| Lovric et al <sup>5</sup> B1245_21 (European)   | Sensorineural hearing loss                                                    | 3 yr  | Normal CT findings                                                                   | Lovric et al <sup>5</sup> |
| Lovric et al <sup>5</sup> MC (European)         | Peripheral neuropathy (motor and sensory), mononeuritis multiplex, strabismus | 18 yr | MR imaging without contrast; normal MR imaging findings                              | Lovric et al <sup>5</sup> |

**Note:**—EB1 and MC refer to the original designation of individual patients with SPLIS as described in the original reports of cohorts of more than one SPLIS patient.

<sup>a</sup>The numbers in column 1 indicate the reference number of the patient given within the original reference (i.e., how the patient was described in the original report of each series).
